# Supplementary material for: Finite-size effect on the percolation and electromechanical behaviors of liquid metal particulate composites
Source: Royal Society of Chemistry journal article supplement (doi:10.1039/d3sm01469j), 2024-01-01
Supplement: d3sm01469j1.pdf [file d3sm01469j1.pdf]

*Supplementary Information for*

## **Finite-size effect on the percolation and electromechanical behaviors of liquid metal particulate composites**

Mohammad Madadi, Pu Zhang<sup>1</sup>

*Department of Mechanical Engineering, State University of New York at Binghamton,  
Binghamton, NY 13902, United States*

### **List of Supplementary Documents:**

Figure S1. A representative finite element model for the simulations.

Figure S2. Resistance vs percolation probability for square samples.

Figure S3. Resistance vs percolation probability for rectangular samples ( $n=5$ ).

Figure S4. Resistance vs percolation probability for rectangular samples ( $n=10$ ).

Figure S5. Resistance vs percolation probability for rectangular samples with defect regions.

Figure S6. Normalized resistance vs stretch ratio for square samples including 30% of LM.

Figure S7. Normalized resistance vs stretch ratio for square samples including 50% of LM.

---

<sup>1</sup> Corresponding author. Email: pzhang@binghamton.edu

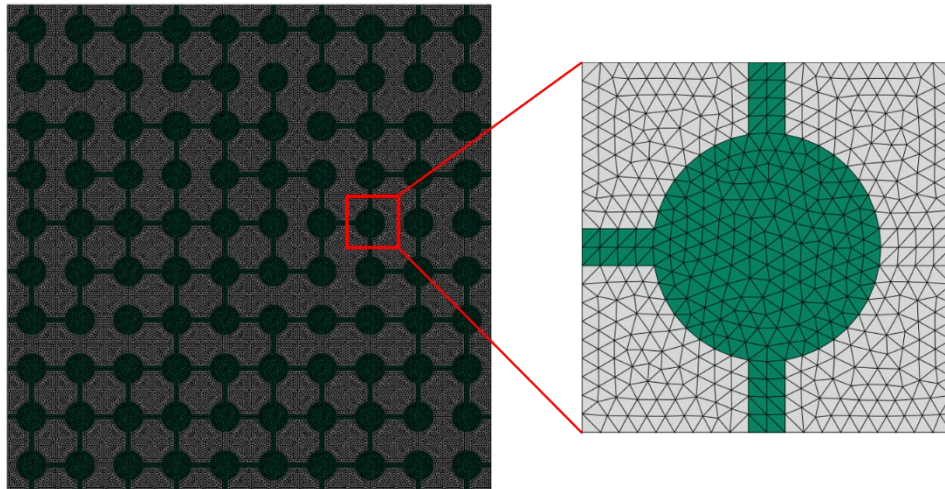

Figure S1. A typical finite element model of the composite with 10\*10 unit cells. The representative unit cell on the right side has three open channels (conductive) and one closed channel (insulated). We use green color for liquid metal and grey for the elastomer matrix.

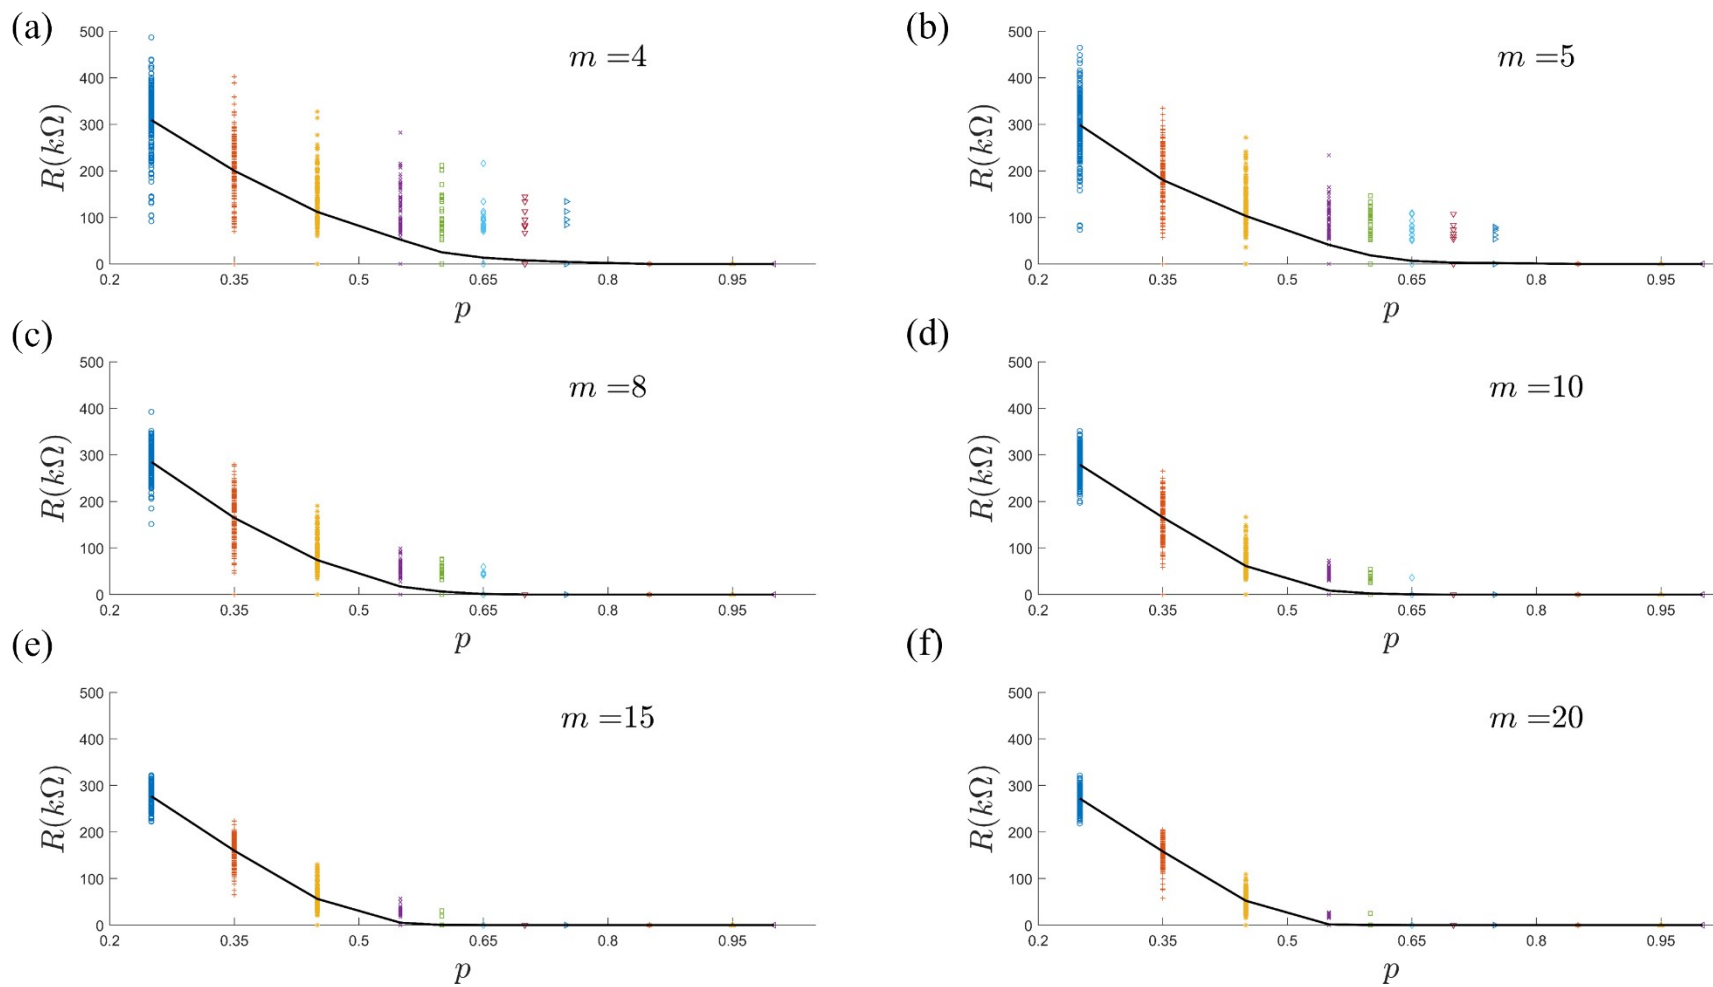

Figure S2. Electrical resistance  $R$  versus percolation probability  $p$  for 170 square samples with different sizes  $m*m$ . The markers indicate the resistance data while the solid lines indicate the mean resistance.

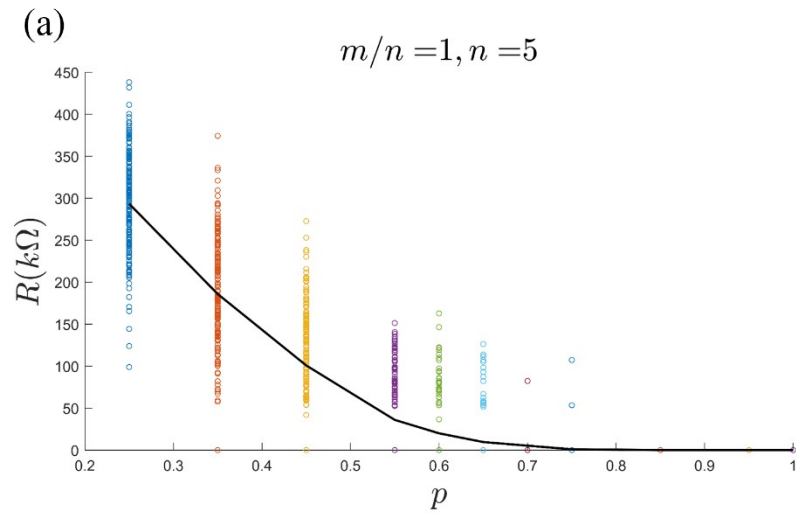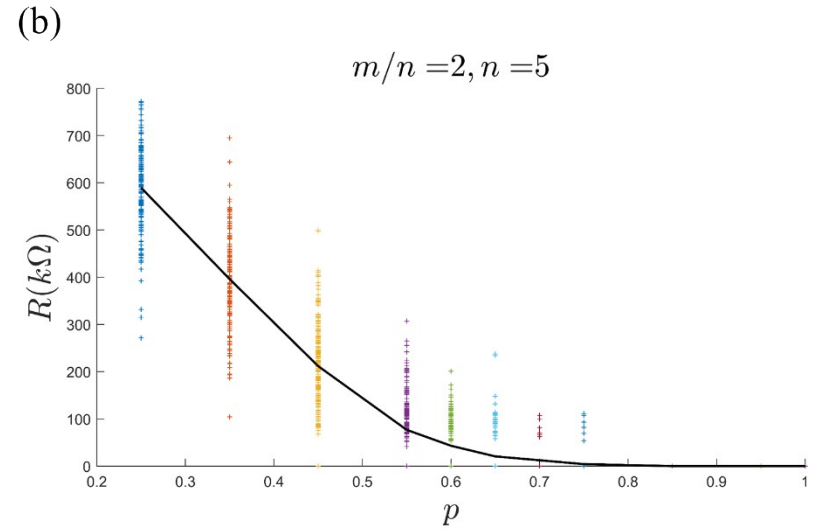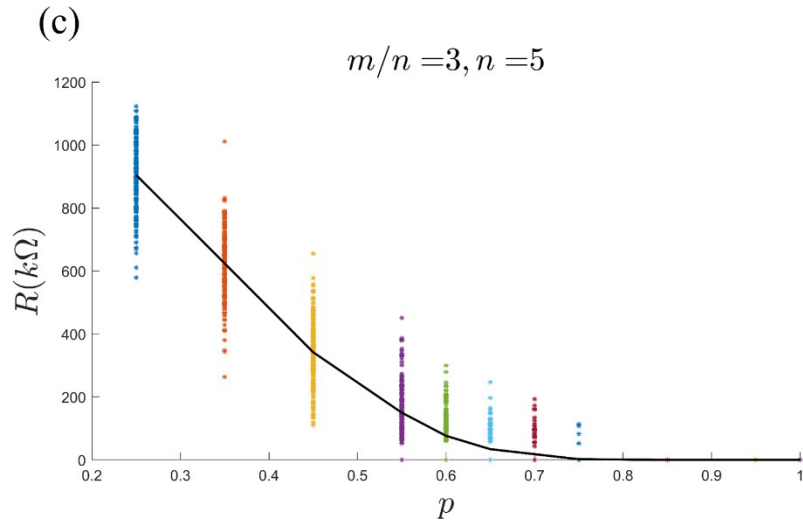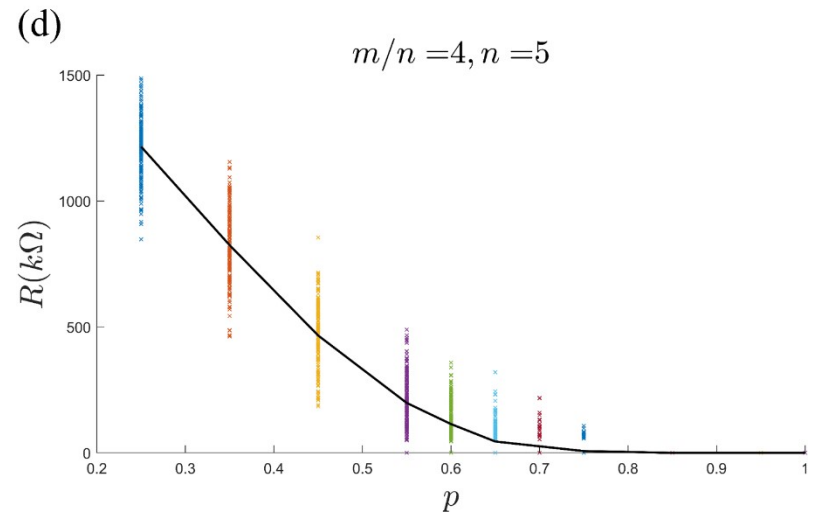

Figure S3. Electrical resistance  $R$  versus percolation probability  $p$  for 170 rectangular samples with  $n=5$  unit cells in width and different aspect ratios: (a)  $m/n=1$ , (b)  $m/n=2$ , (c)  $m/n=3$ , (d)  $m/n=4$ . The markers indicate the resistance data while the solid lines indicate the mean resistance.

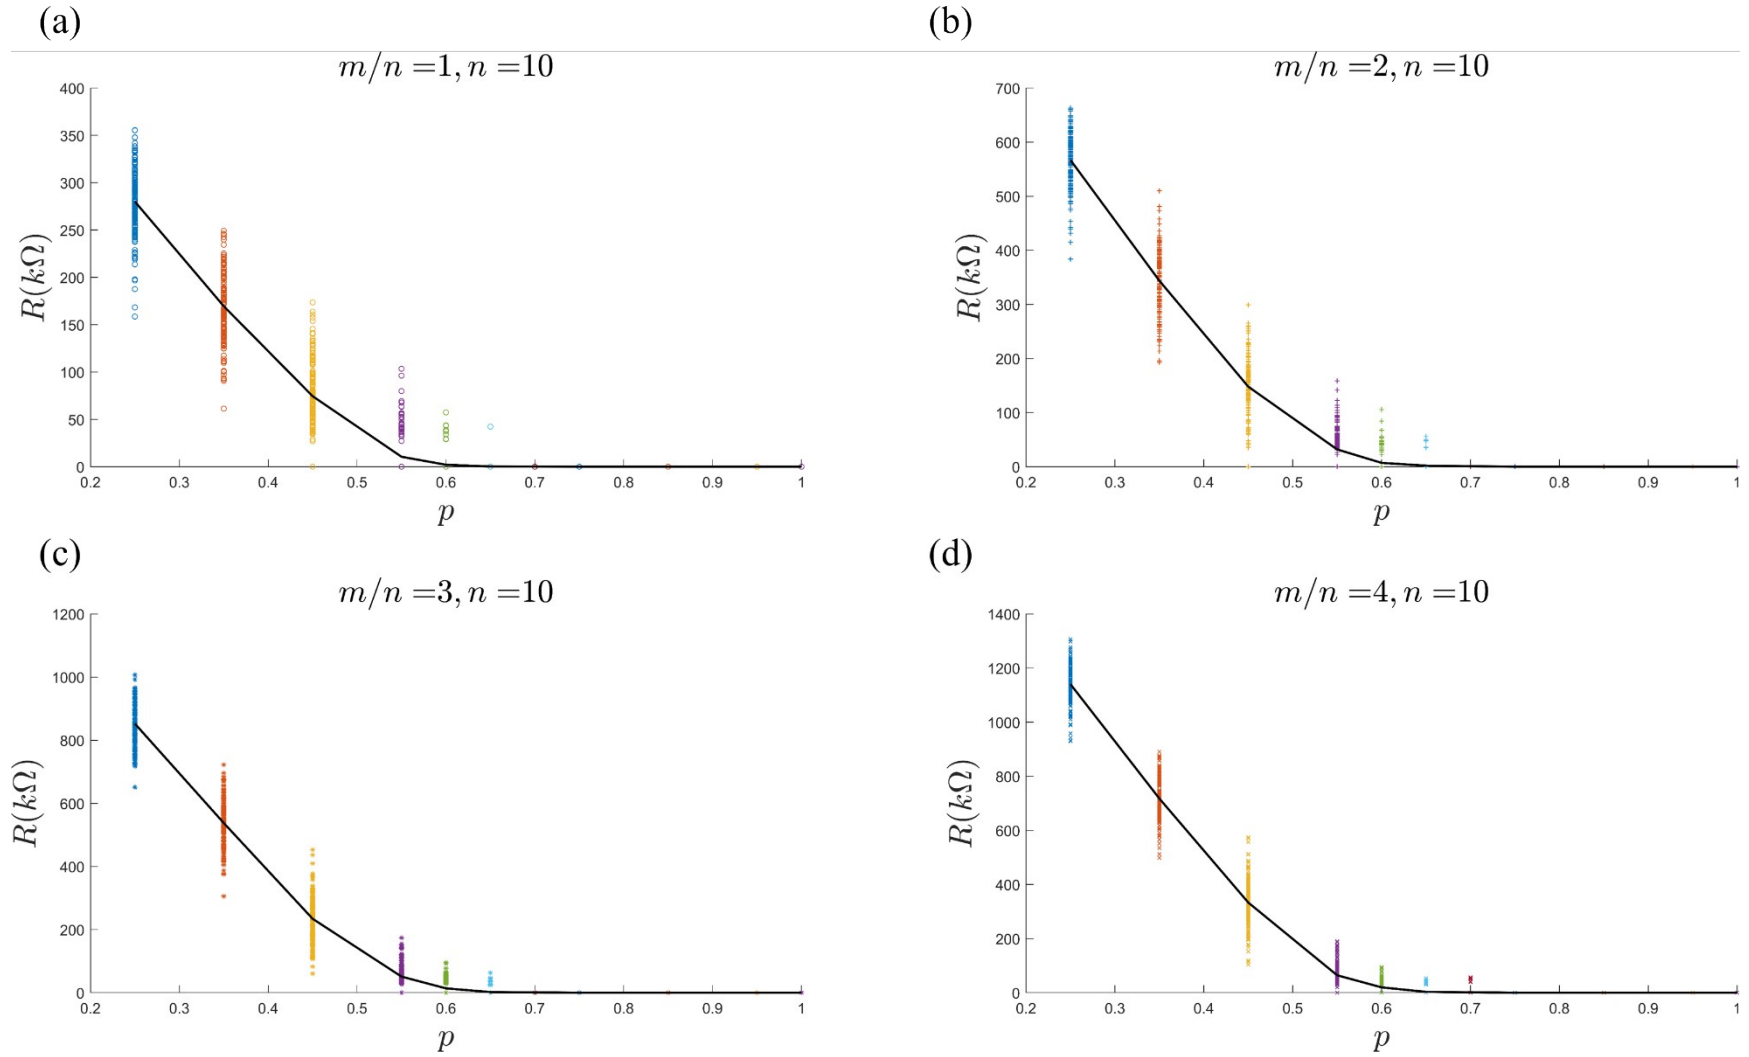

Figure S4. Electrical resistance  $R$  versus percolation probability  $p$  for 170 rectangular samples with 10 unit cells in width and different aspect ratios. (a)  $m/n=1$ , (b)  $m/n=2$ , (c)  $m/n=3$ , (d)  $m/n=4$ . The markers indicate the resistance data while the solid lines indicate the mean resistance.

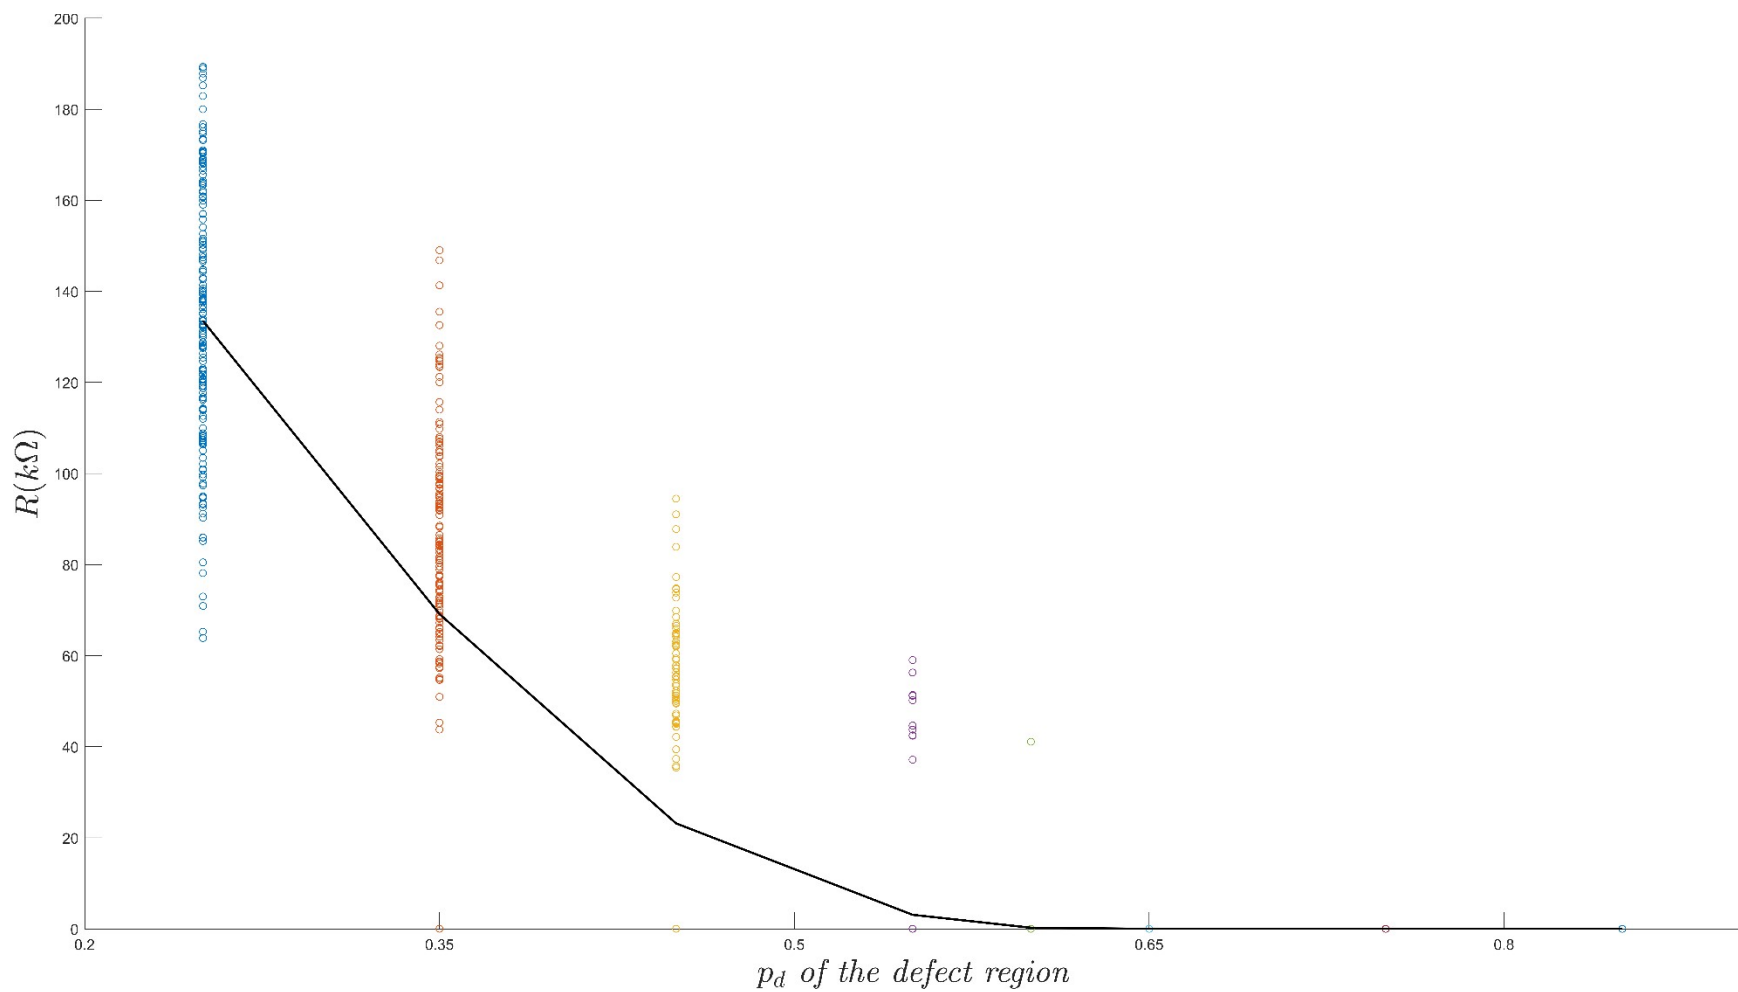

Figure S5. Electrical resistance  $R$  versus percolation probability  $p$  for 170 rectangular samples with defect regions ( $m = 40$ ,  $n = 10$ ). The markers indicate the resistance data while the solid line indicates the mean resistance.

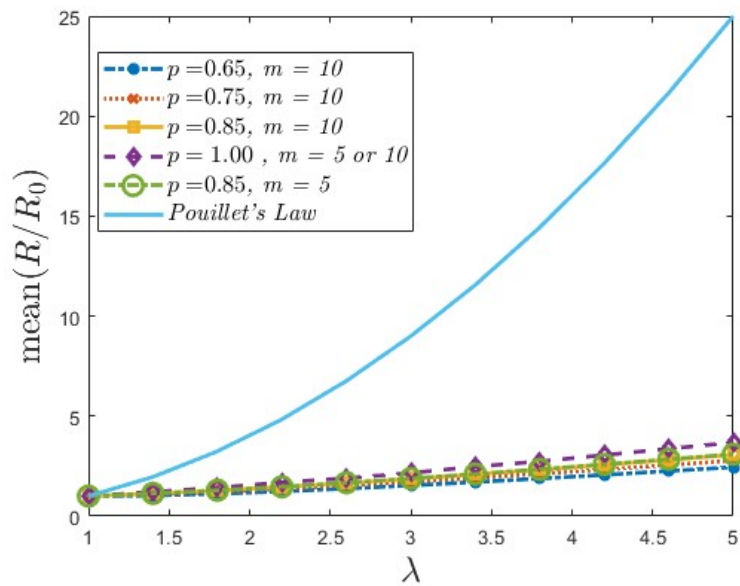

Figure S6. Normalized resistance versus stretch ratio for percolated square models with  $m = 5$  and  $m=10$ . This figure corresponds to Figure 6d in the paper. The samples exhibit strain-insensitive resistance compared to the Pouillet's law.

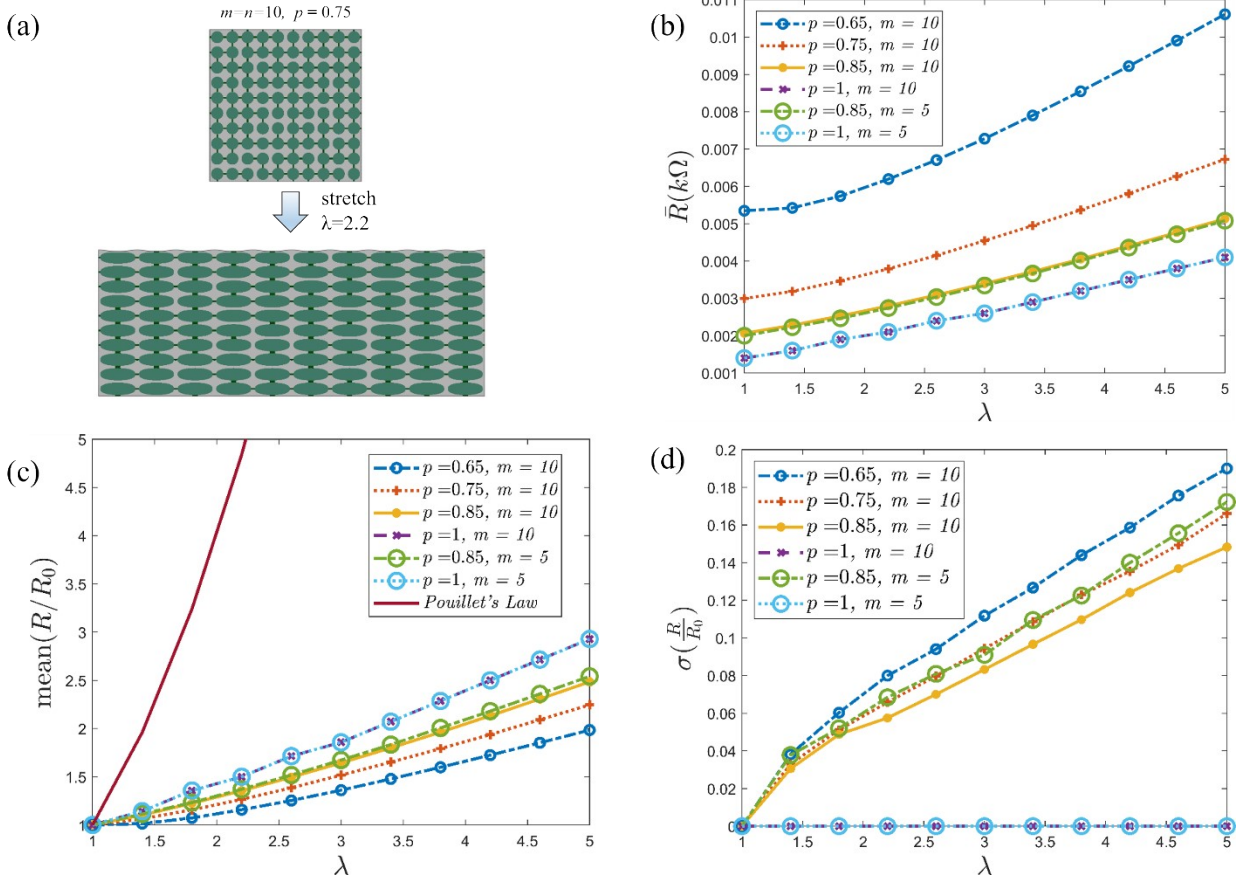

Figure S7 Electromechanical responses of the LMPCs including 50 vol% of LM. The results are similar to Figure 6. (a) A square sample with  $10 \times 10$  unit cells before and after stretch. The unit cell is  $10 \mu\text{m}$  and the particle diameter is  $7.98 \mu\text{m}$ . The percolation probability is  $p = 0.75$ . (b) Influence of the stretch ratio  $\lambda$  on the mean resistance. (c) Influence of the stretch ratio  $\lambda$  on the normalized resistance. The finite-size effect has no correlation with the stretch-resistance responses. (d) Influence of the stretch ratio  $\lambda$  on the standard deviation of the normalized resistance. A smaller sample size induces greater variance of the normalized resistance. Each data point is averaged from 50 simulation models.
